# Supplementary material for: Increased aqueous flare is associated with thickening of inner retinal layers in eyes with retinitis pigmentosa
Source: PubMed Central journal article supplement (PMC5031997; doi:10.1038/srep33921), 2016-09-22
Supplement: srep33921-s1.pdf [file srep33921-s1.pdf]

***Supplementary information***

**Increased aqueous flare is associated with thickening of  
inner retinal layers in eyes with retinitis pigmentosa**

Yosuke Nagasaka<sup>1</sup>, Yasuki Ito<sup>1\*</sup>, Shinji Ueno<sup>1</sup>, Hiroko Terasaki<sup>1</sup>,

<sup>1</sup>Department of Ophthalmology, Nagoya University Graduate School of Medicine,

Nagoya, Japan

**Supplementary Table S1:** Thickness of each retinal layer of RP eyes without CME group and control group ( $\mu\text{m}$ )

|                            | <b>NFL</b>     | <b>GCL</b>     | <b>IPL</b>     | <b>INL</b>     | <b>Outer layers</b> | <b>Total neural retina</b> | <b>Foveal Thickness</b> |
|----------------------------|----------------|----------------|----------------|----------------|---------------------|----------------------------|-------------------------|
| <b>RP eyes without CME</b> | 41.3 $\pm$ 7.1 | 59.3 $\pm$ 9.7 | 33.3 $\pm$ 4.9 | 50.3 $\pm$ 7.2 | 95.9 $\pm$ 36.5     | 279.9 $\pm$ 41.9           | 200.6 $\pm$ 62.9        |
| <b>Controls</b>            | 27.6 $\pm$ 2.1 | 52.5 $\pm$ 2.5 | 33.0 $\pm$ 2.2 | 44.4 $\pm$ 2.3 | 172.9 $\pm$ 7.9     | 330.2 $\pm$ 11.8           | 227.6 $\pm$ 18.3        |
| <b><i>P</i></b>            | <0.001         | 0.01           | 0.84           | 0.004          | <0.001              | <0.001                     | 0.12                    |

NFL= nerve fiber layer; GCL=ganglion cell layer; IPL= inner plexiform layer; INL=inner nuclear layer; RP=retinitis pigmentosa; CME=cystoid macular edema; Total neural retina= NFL+GCL+IPL+INL+Outer layers

**Supplementary Table S2:** Association of covariables with the thicker retinal layers in RP eyes

| Dependent Variable    | Covariables                    | $\beta$ | Standard Error | 95% Wald Confidence Interval | <i>P</i> |
|-----------------------|--------------------------------|---------|----------------|------------------------------|----------|
| Nerve Fiber Layer     | Aqueous flare (pc/ms)          | 0.75    | 0.27           | 0.22 to 1.27                 | 0.006    |
|                       | Outer layers ( $\mu\text{m}$ ) | -0.042  | 0.022          | -0.085 to -0.000             | 0.049    |
|                       | SERE (diopters)                | 0.17    | 0.16           | -0.15 to 0.49                | 0.29     |
|                       | Age (yrs)                      | -0.039  | 0.061          | -0.16 to 0.080               | 0.52     |
| Ganglion Cell Layer   | Aqueous flare (pc/ms)          | 0.76    | 0.32           | 0.14 to 1.37                 | 0.017    |
|                       | Outer layers ( $\mu\text{m}$ ) | 0.033   | 0.29           | -0.023 to 0.089              | 0.25     |
|                       | SERE (diopters)                | 0.23    | 0.39           | -0.53 to 0.99                | 0.55     |
|                       | Age (yrs)                      | -0.085  | 0.075          | -0.23 to 0.063               | 0.26     |
| Inner Nuclear Layer   | Aqueous flare (pc/ms)          | 0.46    | 0.16           | 0.14 to 0.78                 | 0.005    |
|                       | Outer layers ( $\mu\text{m}$ ) | -0.043  | 0.019          | -0.080 to -0.005             | 0.026    |
|                       | SERE (diopters)                | -0.40   | 0.21           | -0.82 to 0.014               | 0.058    |
|                       | Age (yrs)                      | 0.00    | 0.058          | -0.12 to 0.11                | 0.99     |
| Ganglion Cell Complex | Aqueous flare (pc/ms)          | 0.81    | 0.23           | 0.37 to 1.26                 | <0.001   |
|                       | Outer layers ( $\mu\text{m}$ ) | 0.053   | 0.057          | -0.058 to 0.16               | 0.35     |
|                       | SERE (diopters)                | 1.23    | 0.69           | -0.13 to 2.59                | 0.076    |
|                       | Age (yrs)                      | -0.21   | 0.15           | -0.51 to 0.094               | 0.18     |

SERE= spherical equivalent refractive error

**Supplementary Table S3:** Association of covariables with the visual acuity in RP eyes

| Dependent Variable | Covariables                        | $\beta$ | Standard Error | 95% Wald Confidence Interval | <i>P</i> |
|--------------------|------------------------------------|---------|----------------|------------------------------|----------|
| BCVA<br>(logMAR)   | Foveal thickness ( $\mu\text{m}$ ) | -0.0050 | 0.00060        | -0.0060 to 0.0035            | <0.001   |
|                    | Age (yrs)                          | 0.0030  | 0.0026         | -0.0020 to 0.008             | 0.18     |
|                    | Aqueous flare (pc/ms)              | 0.0090  | 0.011          | -0.012 to 0.030              | 0.38     |
|                    | SERE (diopters)                    | 0.0080  | 0.011          | -0.013 to 0.030              | 0.46     |

BCVA= best-corrected visual acuity; SERE= spherical equivalent refractive error

**Supplementary Table S4:** Association of covariables with the visual field in RP eyes

| Dependent Variable | Covariables                    | $\beta$ | Standard Error | 95% Wald Confidence Interval | <i>P</i> |
|--------------------|--------------------------------|---------|----------------|------------------------------|----------|
| Visual field score | Outer layers ( $\mu\text{m}$ ) | 0.064   | 0.0075         | 0.049 to 0.078               | <0.001   |
|                    | Aqueous flare (pc/ms)          | -0.14   | 0.070          | -0.28 to -0.007              | 0.040    |
|                    | Age (yrs)                      | -0.024  | 0.022          | -0.067 to 0.019              | 0.28     |
|                    | SERE (diopters)                | 0.070   | 0.10           | -0.13 to 0.27                | 0.49     |

SERE= spherical equivalent refractive error
